# Supplementary material for: The Characteristics and Nomogram for Primary Lung Papillary Adenocarcinoma
Source: PubMed Central journal article supplement (PMC7070103; doi:10.1515/med-2020-0014), 2020-02-20
Supplement: med-15-092_sm.pdf [file med-15-092_sm.pdf]

# Electronic supplementary material

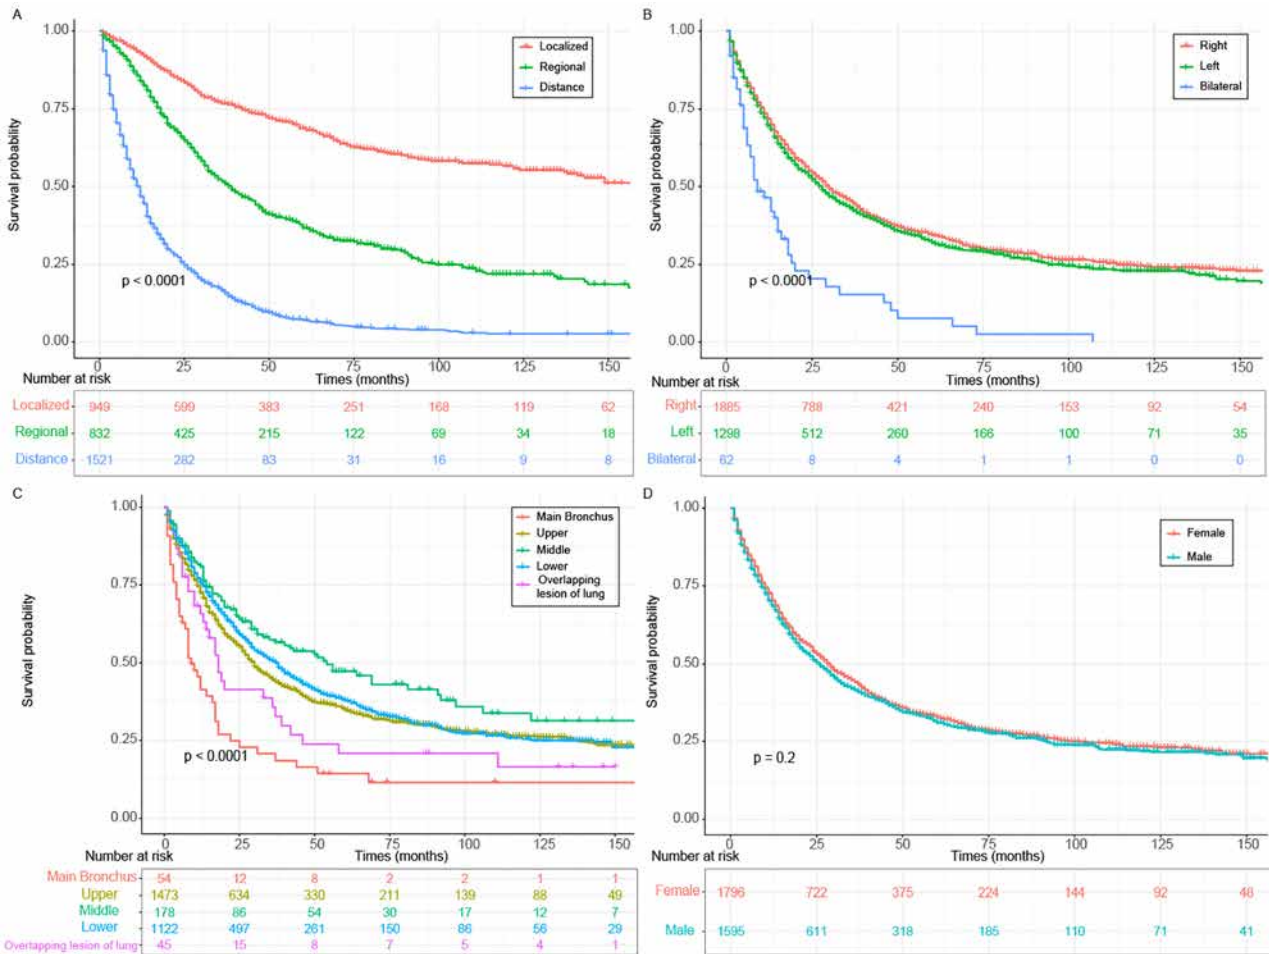

**Supplementary Figure S1:** OS for primary pulmonary PA patients classified by (A) SEER summary stages. (B) laterality. (C) lobe. (D) sex. Abbreviations: OS, overall survival; PA, papillary adenocarcinoma; SEER, Surveillance, Epidemiology and End Results.

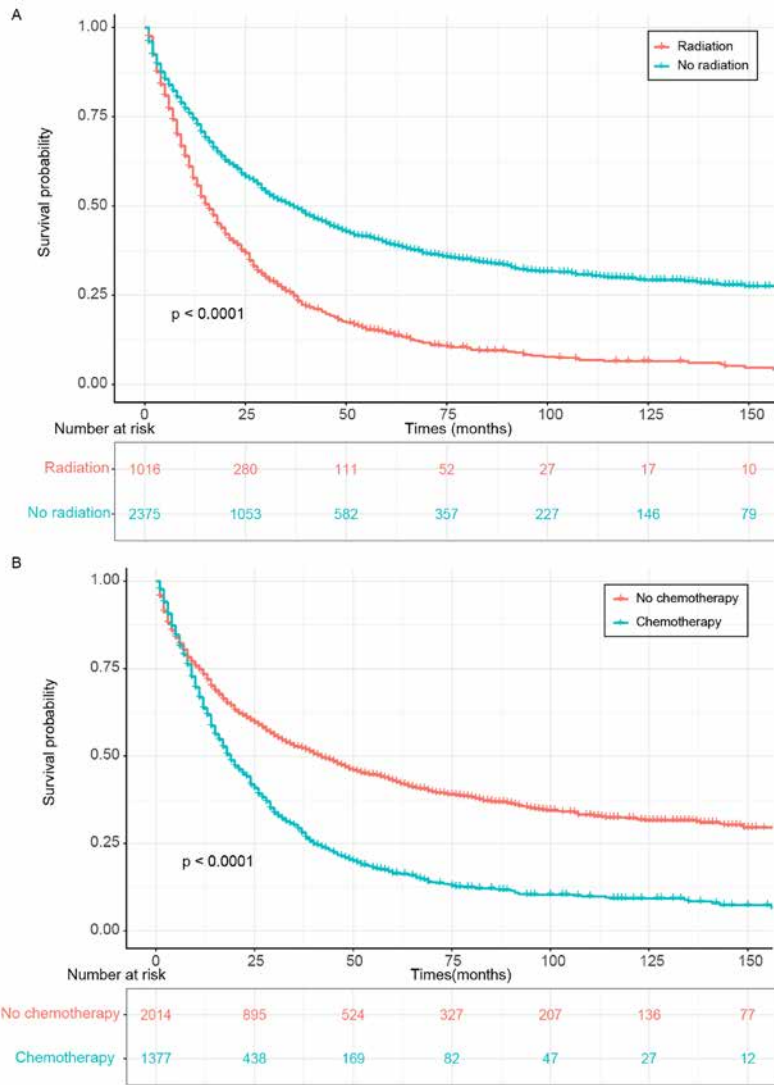

**Supplementary Figure S2:** OS for primary pulmonary PA patients classified by (A) radiation before PSM analysis. (B) chemotherapy before PSM analysis

Abbreviations: OS, overall survival; PA, papillary adenocarcinoma; PSM, propensity-score matching.

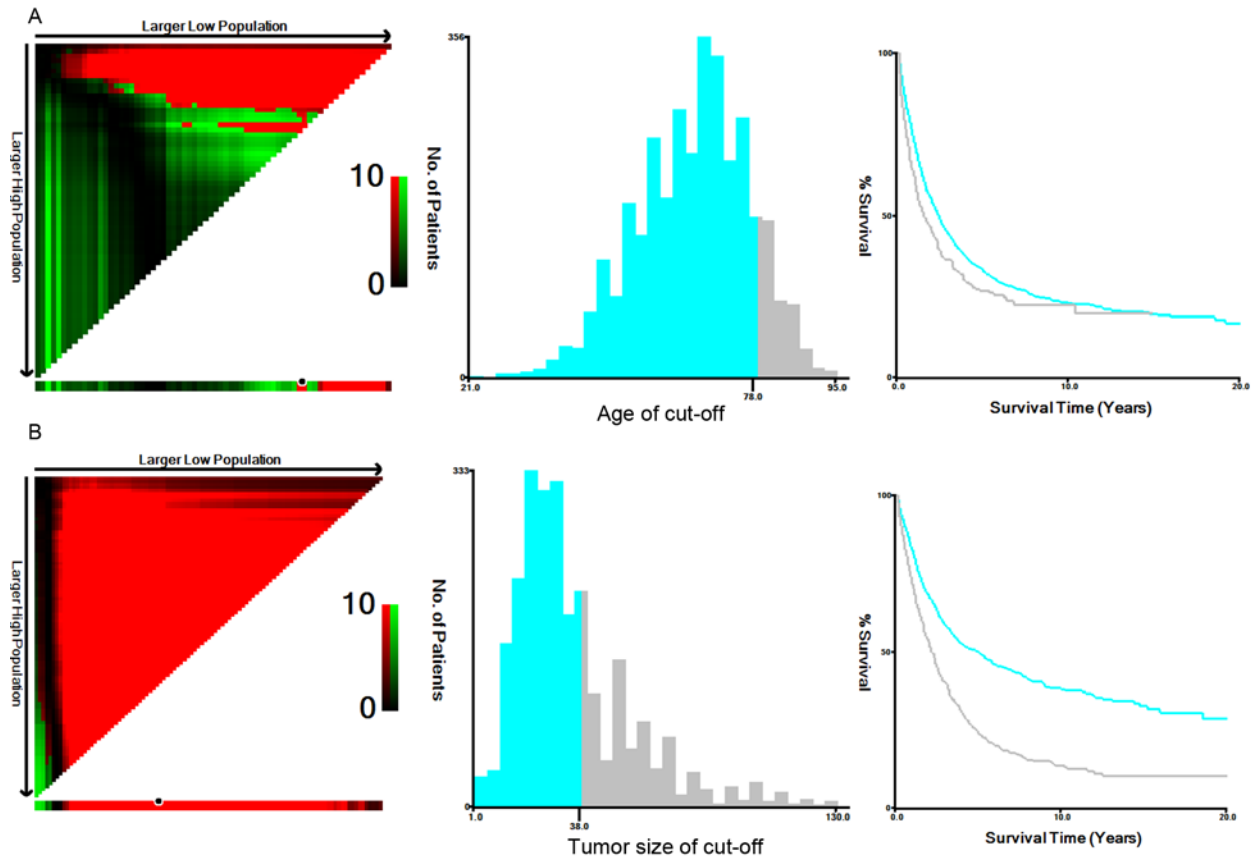

**Supplementary Figure S3:** The optimal cut-off of tumor size and age in primary pulmonary PA patients.  
 Abbreviations: PA, papillary adenocarcinoma.

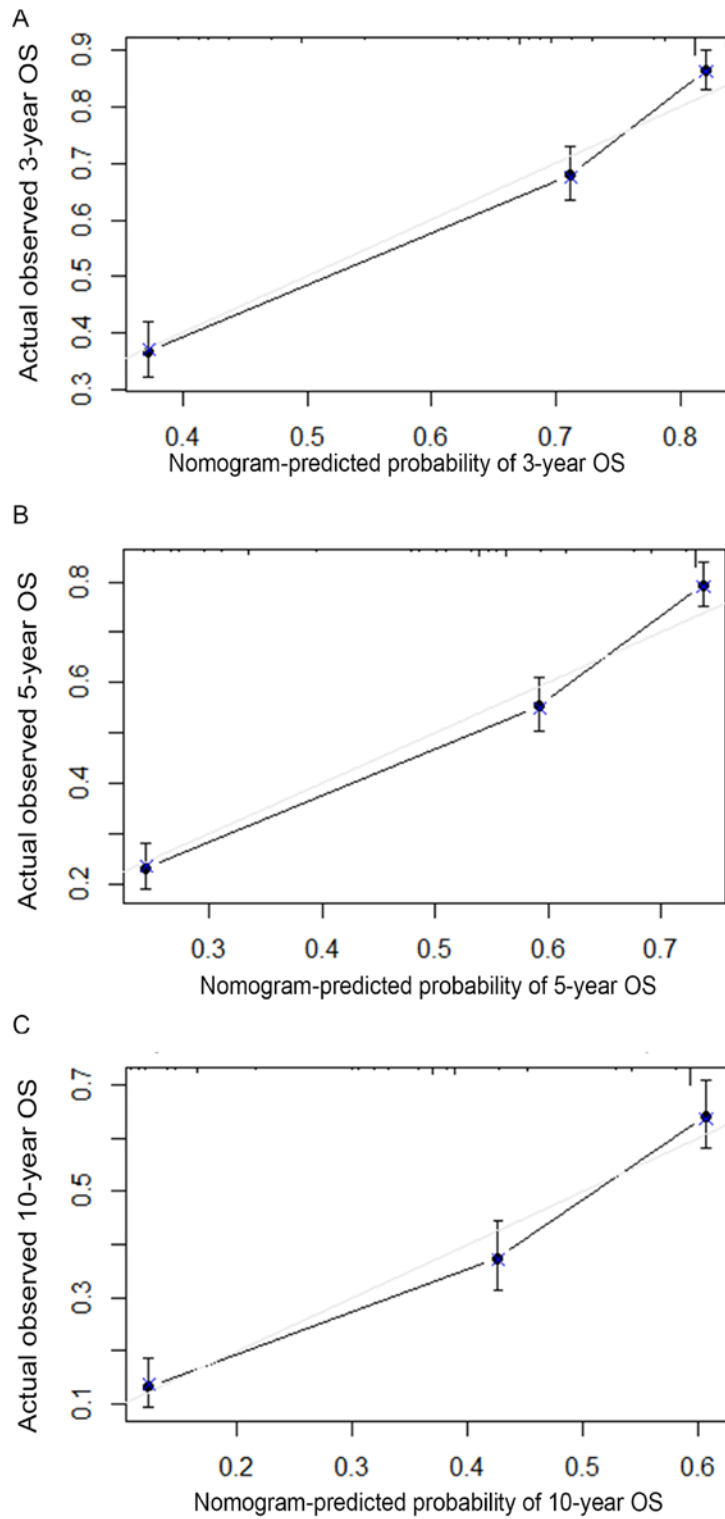

**Supplementary Figure S4:** The calibration curves to estimate primary pulmonary PA patient survival at (A) 3 years and (B) 5 years, and (C) 10 years.

Abbreviations: PA, papillary adenocarcinoma.

**Supplementary Table S1:** Patient characteristics by radiation before and after PSM

| Variables                  | No Radiation | Radiation | P value | No Radiation | Radiation | P value |
|----------------------------|--------------|-----------|---------|--------------|-----------|---------|
| Total                      | 2375         | 1016      |         | 817          | 817       |         |
| Age(Mean±SD)               | 66.8±11.7    | 63.7±11.8 | <0.001  | 65.0±11.8    | 64.6±11.6 | 0.53    |
| Gender                     |              |           | 0.29    |              |           | 0.25    |
| Female                     | 1244         | 552       |         | 455          | 432       |         |
| Male                       | 1131         | 464       |         | 362          | 385       |         |
| Race                       |              |           | 0.13    |              |           | 0.65    |
| White                      | 1851         | 761       |         | 617          | 614       |         |
| Black                      | 223          | 121       |         | 82           | 95        |         |
| Unknown                    | 301          | 134       |         | 118          | 108       |         |
| Marital status             |              |           | 0.17    |              |           | 0.51    |
| Married                    | 1323         | 600       |         | 467          | 465       |         |
| Single                     | 962          | 384       |         | 329          | 323       |         |
| Unknown                    | 90           | 32        |         | 21           | 29        |         |
| Laterality                 |              |           | <0.001  |              |           | 0.39    |
| Right                      | 1342         | 543       |         | 423          | 441       |         |
| Left                       | 916          | 382       |         | 323          | 305       |         |
| Bilateral                  | 41           | 21        |         | 26           | 18        |         |
| Unknown                    | 76           | 70        |         | 45           | 53        |         |
| Lobe                       |              |           | <0.001  |              |           | 0.59    |
| Upper                      | 30           | 24        |         | 21           | 147       |         |
| Middle                     | 1004         | 469       |         | 350          | 9         |         |
| Lower                      | 135          | 43        |         | 36           | 243       |         |
| Main bronchus              | 826          | 296       |         | 226          | 38        |         |
| Overlapping lesion of lung | 35           | 10        |         | 12           | 363       |         |
| Unknown                    | 345          | 174       |         | 172          | 17        |         |
| Grade                      |              |           | <0.001  |              |           | 0.13    |
| Well; I                    | 456          | 102       |         | 100          | 90        |         |
| Moderately; II             | 841          | 230       |         | 205          | 196       |         |
| Poorly; III                | 217          | 120       |         | 71           | 103       |         |
| Undifferentiated; IV       | 19           | 9         |         | 5            | 7         |         |
| Unknown                    | 842          | 555       |         | 436          | 421       |         |
| Tumor stage                |              |           | <0.001  |              |           | 0.01    |
| T1                         | 1040         | 316       |         | 264          | 245       |         |
| T2                         | 470          | 276       |         | 160          | 43        |         |
| T3                         | 173          | 96        |         | 68           | 71        |         |
| T4                         | 126          | 47        |         | 58           | 219       |         |
| TX                         | 566          | 281       |         | 267          | 239       |         |
| Node status                |              |           | <0.001  |              |           | 0.46    |
| N0                         | 1285         | 227       |         | 190          | 215       |         |
| N1                         | 213          | 98        |         | 101          | 82        |         |

| Variables         | No Radiation  | Radiation | P value | No Radiation | Radiation | P value |
|-------------------|---------------|-----------|---------|--------------|-----------|---------|
|                   | N2 381        | 367       |         | 253          | 250       |         |
|                   | N3 127        | 114       |         | 83           | 80        |         |
|                   | NX 369        | 210       |         | 190          | 190       |         |
| Metastasis status |               |           | <0.001  |              |           | <0.001  |
|                   | M0 1643       | 398       |         | 403          | 30        |         |
|                   | M1 637        | 583       |         | 369          | 447       |         |
|                   | MX 95         | 35        |         | 45           | 340       |         |
| Summary stage     |               |           | <0.001  |              |           | 0.29    |
|                   | Localized 878 | 71        |         | 85           | 69        |         |
|                   | Regional 573  | 259       |         | 209          | 220       |         |
|                   | Distance 857  | 664       |         | 494          | 508       |         |
|                   | Unknown 67    | 22        |         | 29           | 20        |         |
| Surgery           |               |           | <0.001  |              |           | 0.71    |
|                   | No 1406       | 257       |         | 246          | 239       |         |
|                   | Yes 964       | 758       |         | 571          | 578       |         |
| Chemotherapy      |               |           | <0.001  |              |           | 0.58    |
|                   | No 1613       | 401       |         | 360          | 371       |         |
|                   | Yes 762       | 615       |         | 457          | 446       |         |

Abbreviation: PSM: Propensity-score matching; SD, standard deviation

**Supplementary Table S2:** Patient characteristics by chemotherapy before and after PSM

| Variables                  | No Chemotherapy | Chemotherapy | P value | No Chemotherapy | Chemotherapy | P value |
|----------------------------|-----------------|--------------|---------|-----------------|--------------|---------|
| Total                      | 2014            | 1377         |         | 415             | 415          |         |
| Age(Mean±SD)               | 68.2±10.7       | 62.6±11.5    | <0.001  | 65.5±11.8       | 65.8±11.3    | 0.72    |
| Gender                     |                 |              | 0.45    |                 |              | 0.36    |
| Female                     | 1056            | 958          |         | 216             | 185          |         |
| Male                       | 740             | 637          |         | 199             | 230          |         |
| Race                       |                 |              | 0.007   |                 |              | 0.3     |
| White                      | 1590            | 1022         |         | 307             | 312          |         |
| Black                      | 196             | 148          |         | 59              | 43           |         |
| Unknown                    | 228             | 207          |         | 49              | 60           |         |
| Marital status             |                 |              | <0.001  |                 |              | 0.06    |
| Married                    | 1065            | 858          |         | 225             | 250          |         |
| Single                     | 874             | 472          |         | 180             | 149          |         |
| Unknown                    | 75              | 47           |         | 10              | 16           |         |
| Laterality                 |                 |              | 0.006   |                 |              | 0.49    |
| Right                      | 1128            | 757          |         | 244             | 225          |         |
| Left                       | 783             | 515          |         | 248             | 161          |         |
| Bilateral                  | 25              | 37           |         | 6               | 10           |         |
| Unknown                    | 78              | 68           |         | 17              | 19           |         |
| Lobe                       |                 |              | <0.001  |                 |              | 0.79    |
| Upper                      | 22              | 32           |         | 5               | 6            |         |
| Middle                     | 901             | 572          |         | 169             | 167          |         |
| Lower                      | 118             | 60           |         | 19              | 25           |         |
| Main bronchus              | 708             | 414          |         | 143             | 128          |         |
| Overlapping lesion of lung | 21              | 24           |         | 8               | 10           |         |
| Unknown                    | 224             | 275          |         | 71              | 79           |         |
| Grade                      |                 |              | <0.001  |                 |              | 0.24    |
| Well; I                    | 412             | 146          |         | 67              | 60           |         |
| Moderately; II             | 722             | 349          |         | 120             | 115          |         |
| Poorly; III                | 169             | 168          |         | 40              | 57           |         |
| Undifferentiated; IV       | 18              | 10           |         | 2               | 0            |         |
| Unknown                    | 693             | 704          |         | 186             | 183          |         |
| Tumor stage                |                 |              | <0.001  |                 |              | 0.25    |
| T1                         | 944             | 412          |         | 151             | 117          |         |
| T2                         | 429             | 317          |         | 84              | 29           |         |
| T3                         | 138             | 131          |         | 37              | 36           |         |
| T4                         | 81              | 92           |         | 18              | 100          |         |
| TX                         | 422             | 425          |         | 125             | 133          |         |
| Node status                |                 |              | <0.001  |                 |              | 0.72    |
| N0                         | 1168            | 344          |         | 154             | 163          |         |
| N1                         | 181             | 130          |         | 42              | 49           |         |
| N2                         | 294             | 454          |         | 103             | 103          |         |

| Variables         | No Chemotherapy | Chemotherapy | P value | No Chemotherapy | Chemotherapy | P value |
|-------------------|-----------------|--------------|---------|-----------------|--------------|---------|
|                   | N3 57           | 184          |         | 21              | 20           |         |
|                   | NX 314          | 265          |         | 95              | 80           |         |
| Metastasis status |                 |              | <0.001  |                 |              | 0.003   |
|                   | M0 1448         | 593          |         | 243             | 215          |         |
|                   | M1 486          | 734          |         | 146             | 187          |         |
|                   | MX 80           | 50           |         | 26              | 13           |         |
| Summary stage     |                 |              | <0.001  |                 |              | <0.001  |
|                   | Localized 852   | 97           |         | 111             | 56           |         |
|                   | Regional 486    | 346          |         | 100             | 117          |         |
|                   | Distance 614    | 907          |         | 183             | 233          |         |
|                   | Unknown 62      | 27           |         | 21              | 9            |         |
| Surgery           |                 |              | <0.001  | 187             | 173          | 0.49    |
|                   | No 1249         | 414          |         | 227             | 241          |         |
|                   | Yes 762         | 960          |         |                 |              |         |
| Radiation         |                 |              | <0.001  |                 |              | 0.87    |
|                   | No 1613         | 762          |         | 292             | 294          |         |
|                   | Yes 401         | 615          |         | 123             | 121          |         |

Abbreviation: PSM: Propensity-score matching; SD, standard deviation



**Supplementary Table S3:** Overall survival stratified by clinical characteristics for patients with Papillary Adenocarcinoma

| Characteristics            | 3-year | 95% CI      | 5-year | 95% CI      | 10-year | 95% CI      |
|----------------------------|--------|-------------|--------|-------------|---------|-------------|
| Total                      | 0.43   | (0.41-0.45) | 0.32   | (0.30-0.34) | 0.22    | (0.21-0.25) |
| Age                        |        |             |        |             |         |             |
| ≤78                        | 0.44   | (0.42-0.46) | 0.33   | (0.31-0.35) | 0.23    | (0.21-0.25) |
| >78                        | 0.36   | (0.31-0.42) | 0.27   | (0.22-0.33) | 0.20    | (0.14-0.28) |
| Gender                     |        |             |        |             |         |             |
| Female                     | 0.44   | (0.42-0.47) | 0.33   | (0.3-0.35)  | 0.23    | (0.21-0.26) |
| Male                       | 0.42   | (0.39-0.44) | 0.31   | (0.28-0.34) | 0.17    | (0.14-0.22) |
| Race                       |        |             |        |             |         |             |
| White                      | 0.43   | (0.41-0.45) | 0.32   | (0.3-0.34)  | 0.23    | (0.21-0.25) |
| Black                      | 0.37   | (0.31-0.43) | 0.30   | (0.25-0.37) | 0.20    | (0.15-0.28) |
| Other                      | 0.45   | (0.4-0.5)   | 0.34   | (0.29-0.4)  | 0.21    | (0.16-0.28) |
| Marital status             |        |             |        |             |         |             |
| Married                    | 0.43   | (0.41-0.46) | 0.32   | (0.29-0.34) | 0.22    | (0.2-0.25)  |
| Single                     | 0.42   | (0.39-0.45) | 0.32   | (0.29-0.35) | 0.22    | (0.19-0.26) |
| Laterality                 |        |             |        |             |         |             |
| Right                      | 0.45   | (0.43-0.48) | 0.34   | (0.32-0.37) | 0.25    | (0.22-0.28) |
| Left                       | 0.43   | (0.4-0.46)  | 0.32   | (0.29-0.35) | 0.23    | (0.2-0.26)  |
| Bilateral                  | 0.15   | (0.08-0.31) | 0.05   | (0.01-0.19) | /       |             |
| Lobe                       |        |             |        |             |         |             |
| Main bronchus              | 0.19   | (0.1-0.33)  | 0.15   | (0.07-0.29) | 0.12    | (0.05-0.26) |
| Upper                      | 0.45   | (0.42-0.47) | 0.35   | (0.32-0.38) | 0.26    | (0.23-0.29) |
| Middle                     | 0.58   | (0.5-0.66)  | 0.47   | (0.39-0.57) | 0.31    | (0.22-0.44) |
| Lower                      | 0.51   | (0.48-0.54) | 0.38   | (0.35-0.42) | 0.25    | (0.22-0.29) |
| Overlapping lesion of lung | 0.36   | (0.23-0.55) | 0.21   | (0.11-0.4)  | 0.17    | (0.08-0.36) |
| Grade                      |        |             |        |             |         |             |
| Well; I                    | 0.64   | (0.6-0.69)  | 0.53   | (0.48-0.58) | 0.35    | (0.3-0.42)  |
| Moderately; II             | 0.57   | (0.54-0.6)  | 0.45   | (0.41-0.49) | 0.33    | (0.29-0.37) |
| Poorly; III                | 0.38   | (0.32-0.44) | 0.26   | (0.21-0.32) | 0.19    | (0.14-0.25) |
| Undifferentiated; IV       | 0.41   | (0.25-0.66) | 0.36   | (0.21-0.62) | 0.30    | (0.16-0.57) |
| Tumor stage                |        |             |        |             |         |             |
| T1                         | 0.60   | (0.57-0.63) | 0.51   | (0.48-0.54) | 0.41    | (0.37-0.44) |
| T2                         | 0.46   | (0.43-0.51) | 0.33   | (0.29-0.37) | 0.20    | (0.16-0.25) |
| T3                         | 0.36   | (0.3-0.43)  | 0.23   | (0.18-0.3)  | 0.12    | (0.07-0.2)  |
| T4                         | 0.36   | (0.29-0.45) | 0.18   | (0.13-0.27) | 0.08    | (0.04-0.16) |
| Tumor size                 |        |             |        |             |         |             |
| ≤ 38 mm                    | 0.58   | (0.55-0.61) | 0.49   | (0.47-0.53) | 0.38    | (0.35-0.42) |
| > 38 mm                    | 0.39   | (0.36-0.43) | 0.24   | (0.20-0.27) | 0.13    | (0.10-0.17) |
| Node status                |        |             |        |             |         |             |
| N0                         | 0.65   | (0.63-0.68) | 0.56   | (0.53-0.59) | 0.44    | (0.4-0.48)  |
| N1-3                       | 0.29   | (0.27-0.32) | 0.17   | (0.15-0.2)  | 0.09    | (0.07-0.12) |

| Characteristics   | 3-year | 95% CI      | 5-year | 95% CI      | 10-year | 95% CI      |
|-------------------|--------|-------------|--------|-------------|---------|-------------|
| Metastasis status |        |             |        |             |         |             |
| M0                | 0.58   | (0.56-0.61) | 0.48   | (0.45-0.5)  | 0.35    | (0.33-0.38) |
| M1                | 0.17   | (0.15-0.2)  | 0.07   | (0.05-0.09) | 0.02    | (0.01-0.04) |
| Summary stage     |        |             |        |             |         |             |
| Localized         | 0.77   | (0.74-0.8)  | 0.69   | (0.65-0.72) | 0.57    | (0.52-0.61) |
| Regional          | 0.52   | (0.48-0.56) | 0.37   | (0.33-0.41) | 0.22    | (0.18-0.27) |
| Distance          | 0.17   | (0.15-0.19) | 0.07   | (0.06-0.09) | 0.03    | (0.02-0.04) |
| TNM               |        |             |        |             |         |             |
| I                 | 0.82   | (0.8-0.85)  | 0.74   | (0.71-0.78) | 0.60    | (0.55-0.65) |
| II                | 0.62   | (0.57-0.68) | 0.47   | (0.41-0.54) | 0.30    | (0.24-0.38) |
| III               | 0.37   | (0.32-0.43) | 0.24   | (0.2-0.29)  | 0.15    | (0.11-0.21) |
| IV                | 0.17   | (0.15-0.2)  | 0.07   | (0.05-0.09) | 0.02    | (0.01-0.04) |
| Surgery           |        |             |        |             |         |             |
| Yes               | 0.69   | (0.66-0.71) | 0.57   | (0.54-0.6)  | 0.41    | (0.38-0.45) |
| No                | 0.17   | (0.15-0.19) | 0.07   | (0.06-0.09) | 0.04    | (0.03-0.05) |
| Radiation         |        |             |        |             |         |             |
| No                | 0.50   | (0.48-0.53) | 0.40   | (0.37-0.42) | 0.30    | (0.27-0.32) |
| Yes               | 0.26   | (0.23-0.29) | 0.14   | (0.12-0.17) | 0.07    | (0.05-0.09) |
| Chemotherapy      |        |             |        |             |         |             |
| No                | 0.53   | (0.5-0.55)  | 0.43   | (0.4-0.46)  | 0.32    | (0.3-0.35)  |
| Yes               | 0.29   | (0.27-0.32) | 0.16   | (0.14-0.19) | 0.09    | (0.07-0.12) |

Abbreviation: 95% CI, 95% Confidence interval

**Supplementary Table S4:** Characteristics of patient with Papillary Adenocarcinoma and matched Common-Adenocarcinoma

| Characteristics   | Papillary Adenocarcinoma      | Common-Adenocarcinoma | P-values |
|-------------------|-------------------------------|-----------------------|----------|
| Total             | 3236                          | 3236                  |          |
| Age(Mean±SD)      | 66.4±11.3                     | 66.5±11.2             | 0.93     |
| Gender            |                               |                       | 0.78     |
|                   | Female 1720                   | 1709                  |          |
|                   | Male 1516                     | 1527                  |          |
| Race              |                               |                       | 0.56     |
|                   | White 2533                    | 2531                  |          |
|                   | Black 326                     | 304                   |          |
|                   | Unknown 377                   | 401                   |          |
| Marital status    |                               |                       | 0.41     |
|                   | Married 1813                  | 1780                  |          |
|                   | Single 1302                   | 1316                  |          |
|                   | Unknown 121                   | 140                   |          |
| Lobe              |                               |                       | 0.63     |
|                   | Main bronchus 1442            | 1414                  |          |
|                   | Upper 155                     | 161                   |          |
|                   | Middle 987                    | 1042                  |          |
|                   | Lower 57                      | 48                    |          |
|                   | Overlapping lesion of lung 37 | 31                    |          |
|                   | Unknown 558                   | 540                   |          |
| Grade             |                               |                       | 0.54     |
|                   | Well; I 423                   | 380                   |          |
|                   | Moderately; II 975            | 1006                  |          |
|                   | Poorly; III 364               | 371                   |          |
|                   | Undifferentiated; IV 26       | 23                    |          |
|                   | Unknown 1451                  | 1456                  |          |
| Tumor stage       |                               |                       | 0.72     |
|                   | T1 1275                       | 1238                  |          |
|                   | T2 666                        | 690                   |          |
|                   | T3 246                        | 261                   |          |
|                   | T4 152                        | 165                   |          |
|                   | TX 897                        | 882                   |          |
| Node status       |                               |                       | 0.83     |
|                   | N0 1384                       | 1360                  |          |
|                   | N1-3 1259                     | 1279                  |          |
|                   | NX 593                        | 597                   |          |
| Metastasis status |                               |                       | 0.97     |
|                   | M0 1828                       | 1827                  |          |
|                   | M1 1269                       | 1274                  |          |
|                   | MX 139                        | 135                   |          |

| Characteristics | Papillary Adenocarcinoma | Common-Adenocarcinoma | P-values |
|-----------------|--------------------------|-----------------------|----------|
| Surgery         |                          |                       | 0.77     |
|                 | No 1362                  | 1369                  |          |
|                 | Yes 1866                 | 1856                  |          |
|                 | Unknown 8                | 11                    |          |
| Radiation       |                          |                       | 0.23     |
|                 | No 2277                  | 2233                  |          |
|                 | Yes 959                  | 1003                  |          |
| Chemotherapy    |                          |                       | 0.41     |
|                 | No 1992                  | 1959                  |          |
|                 | Yes 1244                 | 1277                  |          |

Abbreviation: SD, standard deviation
